# Supplementary material for: An efficient method for the synthesis of a polymer brushviaclick chemistry and its ultrasensitive electrochemical detection of AFP
Source: Royal Society of Chemistry journal article supplement (doi:10.1039/c8ay00583d), 2018-01-01
Supplement: c8ay00583d1.pdf [file c8ay00583d1.pdf]

**An Efficient Method for the Synthesis of Polymer Brush via  
Click Chemistry and its Ultrasensitive Electrochemical  
Detection of AFP**

Dongcheng Yang<sup>‡</sup>, Jing Wang<sup>‡</sup>, Hou Chen\*, Hui Xu, Wenxiang Wang, Huawei Yang,  
Donglei Wei, Liangjiu Bai\*

*Key Laboratory of High Performance and Functional Polymer in the Universities of  
Shandong Province, School of Chemistry and Materials Science, Ludong University,  
Yantai 264025, China.*

<sup>‡</sup>These authors contributed equally to the work.

\*Corresponding author. E-mail: ldupolymchen@163.com (H. Chen);

bailiangjiu@163.com (L. J. Bai)

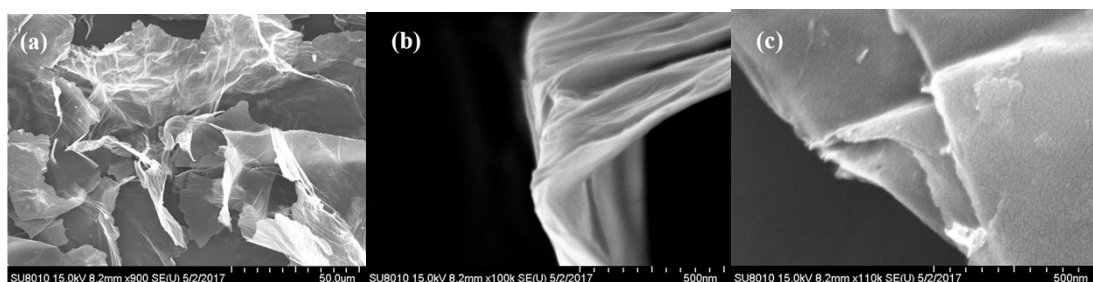

**Fig. S1** SEM surface images of (a), (b) GO and (c) GO-DETA.

**Table S1** Comparison of methods for the detection of AFP.

| Method                              | Detection range     | LODs        | Reference    |
|-------------------------------------|---------------------|-------------|--------------|
| Amperometric Enzyme<br>Immunosensor | 0.05pg/mL-250 ng/mL | 1.1 fg/mL   | S1           |
| Electrochemical<br>Immunosensor     | 0.01 ng/mL-50 ng/mL | 3 pg/mL     | S2           |
| Electrochemical<br>Immunosensor     | 0.01 ng/mL-60 ng/mL | 1.6 pg/mL   | S3           |
| Electrochemical<br>Immunosensor     | 0.1 ng/mL-100 ng/mL | 30 pg/mL    | S4           |
| Electrochemical<br>Immunosensor     | 0.1-300 ng/mL       | 0.03 ng/mL  | S5           |
| Electrochemical<br>Immunosensor     | 1-250 ng/mL         | 0.1 ng/mL   | S6           |
| Electrochemical<br>Immunosensor     | 0.0025 -25ng/mL     | 0.285 pg/mL | This article |

S1. K. Liu, J. Zhang, Q. Liu, H. Huang, *Electrochimica Acta*, 2013, **114**, 448-454.

S2. F. Yang, Y. Chai, R. Yuan, J. Han, Y. Yuan, N. Liao, Z. Yang, *Anal. Methods-UK*, 2013, **5**, 5279-5285.

S3. Y. Wei, Y. Li, N. Li, Y. Zhang, T. Yan, H. Ma, Q. Wei, *Biosens. Bioelectron.*, 2016, **79**, 482-487.

S4. J. Guo, X. Han, J. Wang, J. Zhao, Z. Guo, Y. Zhang, *Anal. Biochem.*, 2015, **491**, 58-64.

S5. Y. Hui, X. Ma, X. Hou, F. Chen, J. Yu, *Ionics*, 2015, **21**, 1751-1759.

S6. K. J. Huang, D. J. Niu, J. Y. Sun, J. J. Zhu, *Anal. Chim. Acta*, **656**, 72-77.
